# Supplementary material for: Civilian mortality and damage to medical facilities in Gaza
Source: PubMed Central journal article supplement — BMJ Glob Health. 2024 May 16;9(5):e014756. doi: 10.1136/bmjgh-2023-014756 (PMC11103200; doi:10.1136/bmjgh-2023-014756), 2024-05-16
Supplement: bmjgh-2023-014756supp001.pdf [file bmjgh-2023-014756supp001.pdf]

Data table and reference used for calculations and breakdown of 2023 data in Figure 1 and Figure 2.

| category           | total                      | gaza_strip                 | west_bank                  |
|--------------------|----------------------------|----------------------------|----------------------------|
| <b>total</b>       | 5483450                    | 2226544/5483450<br>(40.6%) | 3256906/5483450<br>(59.4%) |
| T_14under          | 2046102 (37.3%)            | 898707 (40.4%)             | 1147395 (35.2%)            |
| T_17under_PCBS2022 | 2352850 (43.9%)            | 1023771 (47.3%)            | 1329079 (41.7%)            |
| T_19under          | 2609298 (47.6%)            | 1134644 (51%)              | 1474654 (45.3%)            |
| T_20_34            | 1398419 (25.5%)            | 557324 (25%)               | 841095 (25.8%)             |
| T_35_49            | 815116 (14.9%)             | 310129 (13.9%)             | 504987 (15.5%)             |
| T_50_64            | 469193 (8.6%)              | 158494 (7.1%)              | 310699 (9.5%)              |
| T_65plus           | 191424 (3.5%)              | 65953 (3%)                 | 125471 (3.9%)              |
| T_80plus           | 28191 (0.5%)               | 8463 (0.4%)                | 19728 (0.6%)               |
| <b>female</b>      | 2697550/5483450<br>(49.2%) | 1098618/2226544<br>(49.3%) | 1598932/3256906<br>(49.1%) |
| F_14under          | 1000870 (37.1%)            | 440176 (40.1%)             | 560694 (35.1%)             |
| F_17under_PCBS2022 | 1150471                    | 501073                     | 649398                     |
| F_19under          | 1276612 (47.3%)            | 555560 (50.6%)             | 721052 (45.1%)             |
| F_20_34            | 684275 (25.4%)             | 274497 (25%)               | 409778 (25.6%)             |
| F_35_49            | 405775 (15%)               | 155547 (14.2%)             | 250228 (15.6%)             |
| F_50_64            | 229688 (8.5%)              | 77893 (7.1%)               | 151795 (9.5%)              |
| F_65plus           | 101200 (3.8%)              | 35121 (3.2%)               | 66079 (4.1%)               |
| F_80plus           | 17023 (0.6%)               | 5170 (0.5%)                | 11853 (0.7%)               |
| <b>male</b>        | 2785900/5483450<br>(50.8%) | 1127926/2226544<br>(50.7%) | 1657974/3256906<br>(50.9%) |
| M_14under          | 1045232 (37.5%)            | 458531 (40.7%)             | 586701 (35.4%)             |
| M_17under_PCBS2022 | 1202379                    | 522698                     | 679681                     |
| M_19under          | 1332686 (47.8%)            | 579084 (51.3%)             | 753602 (45.5%)             |
| M_20_34            | 714144 (25.6%)             | 282827 (25.1%)             | 431317 (26%)               |
| M_35_49            | 409341 (14.7%)             | 154582 (13.7%)             | 254759 (15.4%)             |
| M_50_64            | 239505 (8.6%)              | 80601 (7.1%)               | 158904 (9.6%)              |
| M_65plus           | 90224 (3.2%)               | 30832 (2.7%)               | 59392 (3.6%)               |
| M_80plus           | 11168 (0.4%)               | 3293 (0.3%)                | 7875 (0.5%)                |

Sources: Palestinian Health Ministry and the Gaza Government Media Office via the United Nations Office for the Coordination of Humanitarian Affairs. Note on the data: On November 9<sup>th</sup>, the Palestinian Health Ministry lost capacity to document casualties and the Gaza Government Media Office began collecting the data. The Palestinian Health Ministry

*aggregated all ages into their male and female category counts and then separately reported child counts combining male and female children, whereas the Gaza Government Media Office separated adult and children counts and within the adult categories disaggregated gender into male and female. In order to harmonize the counts and produce separate adult male, adult female, and all children counts, we used the number of children in the Gaza Strip by age group and sex for 2022 to get the proportion of male and female children in the general population.<sup>17</sup> We used that proportion to estimate the number of male and female children killed from the total children death count provided by the Palestinian Health Ministry. We then subtracted our estimated number of female children killed by the reported number of all females killed (before November 9<sup>th</sup>) in order to get an estimated number of female adults killed. We then combined our estimated female adult counts with the all-children counts to create the “women and children” category.*

Reference:

Palestinian Central Bureau of Statistics. Almost half of the Palestinian society are children. 2023. Available: [https://www.pcbs.gov.ps/portals/\\_pcbs/PressRelease/Press\\_En\\_ChildDayE2022.pdf](https://www.pcbs.gov.ps/portals/_pcbs/PressRelease/Press_En_ChildDayE2022.pdf). [Accessed 30 Nov 2023].

---
