# Supplementary material for: Civilian mortality and damage to medical facilities in Gaza
Source: PubMed Central journal article supplement — BMJ Glob Health. 2024 May 16;9(5):e014756. doi: 10.1136/bmjgh-2023-014756 (PMC11103200; doi:10.1136/bmjgh-2023-014756), 2024-05-16
Supplement: bmjgh-2023-014756supp002.pdf [file bmjgh-2023-014756supp002.pdf]

## Supplementary References

1. Smith J, Kwong EJJ, Hanbali L, et al. Violence in Palestine demands immediate resolution of its settler colonial root causes. *BMJ Global Health* 2023;8:e014269. <http://dx.doi.org/10.1136/bmjgh-2023-014269>
2. Leatherby L. Gaza civilians, under Israeli barrage, are being killed at historic pace. 2023. Available: <https://www.nytimes.com/2023/11/25/world/middleeast/israel-gaza-death-toll.html>. [Accessed 30 Nov 2023].
3. Krieger N. *Ecosocial Theory, Embodied Truths, and the People's Health*. New York, NY: Oxford University Press (2021).
4. Bartov O. What I believe as a historian of genocide. 2023. Available: <https://www.nytimes.com/2023/11/10/opinion/israel-gaza-genocide-war.html>. [Accessed 30 Nov 2023].
5. Dorn AW. Measuring Israel by the just-war yardstick. 2023. Available: <https://www.nytimes.com/2023/11/12/opinion/israel-gaza-war-crimes.html>. [Accessed 30 Nov 2023].
6. Erakat N. No, Israel does not have the right to self-defense in the international law against occupied Palestinian territory. 2014. Available: <https://www.jadaliyya.com/Details/27551>. [Accessed 30 Nov 2023].
7. Goldman R. What is the rule of proportionality, and is it being observed in the Israeli siege of Gaza? 2023. Available: <https://theconversation.com/what-is-the-rule-of-proportionality-and-is-it-being-observed-in-the-israeli-siege-of-gaza-217321#>. [Accessed 30 Nov 2023].
8. Human Rights Watch. Gaza: Unlawful Israeli hospital strikes worsen health crisis. 2023. Available: <https://www.hrw.org/news/2023/11/14/gaza-unlawful-israeli-hospital-strikes-worsen-health-crisis>. [Accessed 30 Nov 2023].
9. Frankel J. Israel's military campaign in Gaza seen as among the most destructive in recent history, experts say. 2023. Available: <https://apnews.com/article/israel-gaza-bombs-destruction-death-toll-scope-419488c511f83c85baea22458472a796>. [Accessed 25 Dec 2023].
10. Khalili L. *Time in the Shadows: Confinement in Counterinsurgencies*. Stanford, USA: Stanford University Press, 2012.
