# Supplementary material for: Civilian mortality and damage to medical facilities in Gaza
Source: PubMed Central journal article supplement — BMJ Glob Health. 2024 May 16;9(5):e014756. doi: 10.1136/bmjgh-2023-014756 (PMC11103200; doi:10.1136/bmjgh-2023-014756), 2024-05-16
Supplement: bmjgh-2023-014756supp003.pdf [file bmjgh-2023-014756supp003.pdf]

## Data Dictionary for Data Sets Utilized to Build Figure 1 and Figure 2

### Dataset Name (type): ocha\_octnov2023\_killedinjured\_datageneration (csv)

**Description:** This dataset contains casualty counts in the Gaza Strip and the West Bank due to the Israel-Hamas war from October 7<sup>th</sup> 2023 to November 24<sup>th</sup> 2023. Specifically, the dataset includes cumulative deaths by day disaggregated by age and gender in the Gaza Strip and also cumulative deaths and cumulative injuries by day in the West Bank.

**Data created:** 4 December 2023

**Data source:** United Nations Office for the Coordination of Humanitarian Affairs, Palestinian Health Ministry, Gaza Government Media Office, Palestinian Central Bureau of Statistics

**Methods:** We used the data itself and population estimates to disaggregate the daily death counts. On November 9<sup>th</sup>, the Palestinian Health Ministry (PHM) lost capacity to document casualties and the Gaza Government Media Office (GMO) began collecting the data. The Palestinian Health Ministry aggregated all ages into their male and female category counts and then separately reported child counts combining male and female children, whereas the Gaza Government Media Office separated adult and children counts and within the adult categories disaggregated gender into male and female. In order to harmonize the counts and produce separate adult male, adult female, and all children counts, we used the number of children in the Gaza Strip by age group and sex for 2022 ([https://www.pcbs.gov.ps/portals/\\_pcbs/PressRelease/Press\\_En\\_ChildDayE2022.pdf](https://www.pcbs.gov.ps/portals/_pcbs/PressRelease/Press_En_ChildDayE2022.pdf)) to get the proportion of male and female children in the general population. We used that proportion to estimate the number of male and female children killed from the total children death count provided by the Palestinian Health Ministry. We then subtracted our estimated number of female children killed by the reported number of all females killed (before November 9<sup>th</sup>) in order to get an estimated number of female adults killed. We then combined our estimated female adult counts with the all children counts to create the “Women and children” category.

| VARIABLE                    | DESCRIPTION                                                                                                                          |
|-----------------------------|--------------------------------------------------------------------------------------------------------------------------------------|
| Date                        | MM/DD/YYYY                                                                                                                           |
| total_killed                | Cumulative approximate number of all people killed by day. The numbers that get published in general media, sourced from PHM/GMO.    |
| est_femalechild_killed_Gaza | Cumulative estimated number of female children killed by day                                                                         |
| est_malechild_killed_Gaza   | Cumulative estimated number of male children killed by day                                                                           |
| est_femaleadult_killed_Gaza | Cumulative estimated number of female adults killed by day                                                                           |
| est_maleadult_killed_Gaza   | Cumulative estimated number of male adults killed by day                                                                             |
| source_killed_Gaza          | The reporting agency source of the daily casualty counts.<br>PHM = Palestinian Health Ministry<br>GMO = Gaza Government Media Office |
| total_killed_WestBank       | Cumulative approximate number killed in the West Bank by day, sourced from UN OCHA                                                   |

|                        |                                                                                     |
|------------------------|-------------------------------------------------------------------------------------|
| total_injured_WestBank | Cumulative approximate number injured in the West Bank by day, sourced from UN OCHA |
|------------------------|-------------------------------------------------------------------------------------|

**Dataset Name (type): ocha\_past5wars\_datageneration (csv)**

**Description:** This dataset contains total death counts from the 5 previous wars in the last 15 years in the Gaza Strip, including the current Oct 2023 war. The dataset includes total number killed, number killed that were women and children, and the percent killed that were women and children.

**Data created:** 4 December 2023

**Data source:** United Nations Office for the Coordination of Humanitarian Affairs

**Methods:** Using UN OCHA's Data on casualties dashboard

(<https://www.ochaopt.org/data/casualties>) we extracted death data for each war in the Gaza Strip in the last 15 years. The dashboard includes counts disaggregated by age and sex. We used our estimates of women and children killed in the current Oct 2023 war for numbers referring to the current war.

| VARIABLE               | DESCRIPTION                                                                                  |
|------------------------|----------------------------------------------------------------------------------------------|
| war                    | The war in reference:<br>2008-09 war<br>2012 war<br>2014 war<br>2021 war<br>Oct-Nov 2023 war |
| n_killed_total         | Total killed over the entire war time period                                                 |
| n_killed_womenchild    | Number of women and children killed over the entire wartime period                           |
| perc_killed_womenchild | Percent of women and children killed over the entire wartime period out of the total         |
